# Supplementary material
Source: Springer Nature journal article supplement (https://www.springermedizin.de/resource/supplementary/12885_2013_4714_MOESM2_ESM.pdf/9467112)
Supplement: MOESM2 [file 9467112]

## Additional File 2.

**Title:** List and p-values of miRNAs significantly differences in expression between BCVY and BC.

**Description:** Significantly different expressed miRNAs among two sample groups: young women in breast cancer (BCVY, younger than 35 years old) and older than 65 years women with breast cancer (BC). P-values and FDR p-values (corrected for Benjamini and Hochberg's False Discovery Rate for multiple comparisons) were obtained performing a t-test with 200000 permutations. Nomenclature of miRNAs belong to miRBase v.15.

**Additional File 2.** List and p-values of miRNAs significantly differences in expression between BCVY and BC.

| #  | Affymetrix miRNA ID | p-value               | FDR                   | Fold change | Chromosome |
|----|---------------------|-----------------------|-----------------------|-------------|------------|
| 1  | hsa-miR-3196        | 5.00x10 <sup>-6</sup> | 1.39x10 <sup>-4</sup> | 6.745       | 20         |
| 2  | hsa-miR-762         | 5.00x10 <sup>-6</sup> | 1.39x10 <sup>-4</sup> | 6.646       | 16         |
| 3  | hsa-miR-939         | 5.00x10 <sup>-6</sup> | 1.39x10 <sup>-4</sup> | 6.586       | 8          |
| 4  | hsa-miR-149-star    | 5.00x10 <sup>-6</sup> | 1.39x10 <sup>-4</sup> | 6.423       | 2          |
| 5  | hsa-miR-1228-star   | 5.00x10 <sup>-6</sup> | 1.39x10 <sup>-4</sup> | 6.016       | 12         |
| 6  | hsa-miR-1275        | 5.00x10 <sup>-6</sup> | 1.39x10 <sup>-4</sup> | 5.887       | 6          |
| 7  | hsa-miR-132         | 5.00x10 <sup>-6</sup> | 1.39x10 <sup>-4</sup> | -5.572      | 17         |
| 8  | hsa-miR-1908        | 5.00x10 <sup>-6</sup> | 1.39x10 <sup>-4</sup> | 5.411       | 11         |
| 9  | hsa-miR-28-3p       | 5.00x10 <sup>-6</sup> | 1.39x10 <sup>-4</sup> | -4.425      | 3          |
| 10 | hsa-miR-1909        | 1.00x10 <sup>-5</sup> | 1.93x10 <sup>-4</sup> | 6.427       | 19         |
| 11 | hsa-miR-4299        | 1.00x10 <sup>-5</sup> | 1.93x10 <sup>-4</sup> | 5.776       | 11         |
| 12 | hsa-miR-3197        | 1.00x10 <sup>-5</sup> | 1.93x10 <sup>-4</sup> | 5.768       | 21         |
| 13 | hsa-miR-3141        | 1.00x10 <sup>-5</sup> | 1.93x10 <sup>-4</sup> | 5.295       | 5          |
| 14 | v11_hsa-miR-923     | 1.50x10 <sup>-5</sup> | 2.69x10 <sup>-4</sup> | 5.672       | 17         |
| 15 | hsa-miR-92b-star    | 2.00x10 <sup>-5</sup> | 3.35x10 <sup>-4</sup> | 4.981       | 1          |
| 16 | hsa-miR-1202        | 2.50x10 <sup>-5</sup> | 3.69x10 <sup>-4</sup> | 5.226       | 6          |
| 17 | hsa-miR-125a-5p     | 2.50x10 <sup>-5</sup> | 3.69x10 <sup>-4</sup> | -4.764      | 19         |
| 18 | hsa-miR-3175        | 3.00x10 <sup>-5</sup> | 4.18x10 <sup>-4</sup> | 4.867       | 15         |
| 19 | hsa-miR-23b         | 5.00x10 <sup>-5</sup> | 6.00x10 <sup>-4</sup> | -4.541      | 9          |
| 20 | hsa-miR-3162        | 5.50x10 <sup>-5</sup> | 6.00x10 <sup>-4</sup> | 5.121       | 11         |
| 21 | hsa-miR-1224-5p     | 5.50x10 <sup>-5</sup> | 6.00x10 <sup>-4</sup> | 5.000       | 3          |
| 22 | hsa-miR-150-star    | 5.50x10 <sup>-5</sup> | 6.00x10 <sup>-4</sup> | 4.841       | 19         |
| 23 | hsa-miR-638         | 5.50x10 <sup>-5</sup> | 6.00x10 <sup>-4</sup> | 4.691       | 19         |
| 24 | hsa-miR-1308        | 6.50x10 <sup>-5</sup> | 6.80x10 <sup>-4</sup> | 4.592       | X          |
| 25 | hsa-miR-92b         | 7.00x10 <sup>-5</sup> | 7.03x10 <sup>-4</sup> | -4.605      | 1          |
| 26 | hsa-miR-1268        | 7.50x10 <sup>-5</sup> | 7.24x10 <sup>-4</sup> | 5.013       | 15         |
| 27 | hsa-miR-1225-5p     | 8.00x10 <sup>-5</sup> | 7.44x10 <sup>-4</sup> | 4.933       | 16         |
| 28 | hsa-miR-1207-5p     | 8.50x10 <sup>-5</sup> | 7.62x10 <sup>-4</sup> | 4.861       | 8          |
| 29 | hsa-miR-27b         | 1.20x10 <sup>-4</sup> | 1.04x10 <sup>-3</sup> | -3.637      | 9          |
| 30 | hsa-miR-23a         | 1.30x10 <sup>-4</sup> | 1.09x10 <sup>-3</sup> | -4.478      | 19         |
| 31 | hsa-miR-602         | 1.35x10 <sup>-4</sup> | 1.09x10 <sup>-3</sup> | 4.084       | 9          |
| 32 | hsa-miR-2861        | 1.50x10 <sup>-4</sup> | 1.18x10 <sup>-3</sup> | 4.355       | 9          |
| 33 | hsa-miR-663         | 1.70x10 <sup>-4</sup> | 1.29x10 <sup>-3</sup> | 4.036       | 20         |
| 34 | hsa-miR-4281        | 1.85x10 <sup>-4</sup> | 1.37x10 <sup>-3</sup> | 4.608       | 5          |
| 35 | hsa-miR-665         | 2.10x10 <sup>-4</sup> | 1.51x10 <sup>-3</sup> | 4.471       | 14         |
| 36 | hsa-miR-30c-1       | 3.90x10 <sup>-4</sup> | 2.72x10 <sup>-3</sup> | -3.424      | 1          |
| 37 | hsa-miR-205         | 4.70x10 <sup>-4</sup> | 3.14x10 <sup>-3</sup> | -3.334      | 1          |
| 38 | hsa-miR-574-3p      | 4.75x10 <sup>-4</sup> | 3.14x10 <sup>-3</sup> | -4.306      | 4          |
| 39 | hsa-miR-1915        | 5.15x10 <sup>-4</sup> | 3.31x10 <sup>-3</sup> | 3.836       | 10         |
| 40 | hsa-miR-378b        | 6.40x10 <sup>-4</sup> | 4.02x10 <sup>-3</sup> | 3.704       | 3          |
| 41 | hsa-miR-149         | 6.70x10 <sup>-4</sup> | 4.10x10 <sup>-3</sup> | -4.026      | 2          |
| 42 | hsa-miR-26a         | 6.95x10 <sup>-4</sup> | 4.15x10 <sup>-3</sup> | -3.771      | 10         |
| 43 | hsa-miR-1973        | 7.20x10 <sup>-4</sup> | 4.20x10 <sup>-3</sup> | 3.948       | 4          |
| 44 | hsa-miR-148a        | 8.30x10 <sup>-4</sup> | 4.73x10 <sup>-3</sup> | -3.884      | 7          |
| 45 | hp_hsa-mir-1224     | 8.50x10 <sup>-4</sup> | 4.74x10 <sup>-3</sup> | 3.638       | 3          |
| 46 | hsa-miR-183         | 9.70x10 <sup>-4</sup> | 5.29x10 <sup>-3</sup> | -3.907      | 7          |
| 47 | hsa-miR-30a-star    | 1.21x10 <sup>-3</sup> | 6.30x10 <sup>-3</sup> | -3.776      | 6          |
| 48 | hsa-miR-4270        | 1.23x10 <sup>-3</sup> | 6.30x10 <sup>-3</sup> | 3.801       | 3          |

|    |                     |                       |                       |        |    |
|----|---------------------|-----------------------|-----------------------|--------|----|
| 49 | hsa-miR-28-5p       | 1.65x10 <sup>-3</sup> | 8.31x10 <sup>-3</sup> | -3.137 | 3  |
| 50 | hp_hsa-mir-3180-1   | 1.70x10 <sup>-3</sup> | 8.37x10 <sup>-3</sup> | 3.426  | 16 |
| 51 | hsa-miR-494         | 1.79x10 <sup>-3</sup> | 8.66x10 <sup>-3</sup> | 3.459  | 14 |
| 52 | hsa-miR-30e-star    | 1.88x10 <sup>-3</sup> | 8.93x10 <sup>-3</sup> | -3.490 | 1  |
| 53 | hsa-miR-708         | 2.02x10 <sup>-3</sup> | 9.41x10 <sup>-3</sup> | -3.492 | 11 |
| 54 | hsa-miR-22          | 2.11x10 <sup>-3</sup> | 9.65x10 <sup>-3</sup> | -2.446 | 17 |
| 55 | hsa-miR-548a-3p     | 2.25x10 <sup>-3</sup> | 1.01x10 <sup>-2</sup> | 3.526  | 22 |
| 56 | hsa-let-7b          | 2.37x10 <sup>-3</sup> | 1.04x10 <sup>-2</sup> | -3.116 | 22 |
| 57 | hsa-miR-4284        | 2.39x10 <sup>-3</sup> | 1.04x10 <sup>-2</sup> | 3.143  | 7  |
| 58 | hsa-miR-181d        | 2.73x10 <sup>-3</sup> | 1.16x10 <sup>-2</sup> | -3.500 | 19 |
| 59 | hsa-miR-3180-3p     | 2.86x10 <sup>-3</sup> | 1.19x10 <sup>-2</sup> | 3.326  | 10 |
| 60 | hsa-miR-500-star    | 2.89x10 <sup>-3</sup> | 1.19x10 <sup>-2</sup> | -3.287 | X  |
| 61 | hp_hsa-mir-3180-3   | 3.56x10 <sup>-3</sup> | 1.42x10 <sup>-2</sup> | 3.281  | 10 |
| 62 | hsa-miR-455-3p      | 3.57x10 <sup>-3</sup> | 1.42x10 <sup>-2</sup> | -3.159 | 9  |
| 63 | hsa-miR-195         | 4.52x10 <sup>-3</sup> | 1.77x10 <sup>-2</sup> | -2.457 | 17 |
| 64 | hsa-miR-1180        | 5.10x10 <sup>-3</sup> | 1.97x10 <sup>-2</sup> | -3.114 | 17 |
| 65 | v11_hsa-miR-768-3p  | 5.52x10 <sup>-3</sup> | 2.08x10 <sup>-2</sup> | 2.938  | 16 |
| 66 | hsa-miR-139-5p      | 5.55x10 <sup>-3</sup> | 2.08x10 <sup>-2</sup> | -3.131 | 11 |
| 67 | hsa-miR-152         | 6.01x10 <sup>-3</sup> | 2.22x10 <sup>-2</sup> | -2.949 | 17 |
| 68 | hsa-miR-100         | 6.66x10 <sup>-3</sup> | 2.42x10 <sup>-2</sup> | -2.801 | 11 |
| 69 | hsa-miR-1972        | 6.83x10 <sup>-3</sup> | 2.45x10 <sup>-2</sup> | 2.972  | 16 |
| 70 | hsa-miR-29b-2-star  | 6.96x10 <sup>-3</sup> | 2.46x10 <sup>-2</sup> | -2.988 | 1  |
| 71 | hsa-miR-1469        | 7.73x10 <sup>-3</sup> | 2.70x10 <sup>-2</sup> | 2.771  | 15 |
| 72 | hsa-miR-720         | 8.34x10 <sup>-3</sup> | 2.87x10 <sup>-2</sup> | 2.897  | 3  |
| 73 | hsa-miR-486-5p      | 8.81x10 <sup>-3</sup> | 2.92x10 <sup>-2</sup> | -2.914 | 8  |
| 74 | hsa-miR-181a-2-star | 8.83x10 <sup>-3</sup> | 2.92x10 <sup>-2</sup> | -2.921 | 9  |
| 75 | hsa-miR-3178        | 8.84x10 <sup>-3</sup> | 2.92x10 <sup>-2</sup> | 2.800  | 16 |
| 76 | hsa-miR-361-5p      | 9.23x10 <sup>-3</sup> | 3.01x10 <sup>-2</sup> | -2.862 | X  |
| 77 | hsa-miR-1246        | 1.01x10 <sup>-2</sup> | 3.27x10 <sup>-2</sup> | 2.739  | 2  |
| 78 | hsa-miR-342-3p      | 1.13x10 <sup>-2</sup> | 3.58x10 <sup>-2</sup> | -2.777 | 14 |
| 79 | hsa-miR-339-5p      | 1.24x10 <sup>-2</sup> | 3.89x10 <sup>-2</sup> | -2.729 | 7  |
| 80 | hsa-miR-500         | 1.28x10 <sup>-2</sup> | 3.96x10 <sup>-2</sup> | -2.723 | X  |
| 81 | hsa-miR-502-3p      | 1.31x10 <sup>-2</sup> | 4.00x10 <sup>-2</sup> | -2.721 | X  |
| 82 | hsa-miR-29c         | 1.33x10 <sup>-2</sup> | 4.03x10 <sup>-2</sup> | -2.740 | 1  |
| 83 | hsa-miR-422a        | 1.36x10 <sup>-2</sup> | 4.07x10 <sup>-2</sup> | -2.686 | 15 |
| 84 | hsa-miR-99b-star    | 1.40x10 <sup>-2</sup> | 4.14x10 <sup>-2</sup> | -2.672 | 19 |
| 85 | hsa-miR-181a-1      | 1.46x10 <sup>-2</sup> | 4.23x10 <sup>-2</sup> | -2.630 | 1  |
| 86 | hsa-miR-26b         | 1.47x10 <sup>-2</sup> | 4.23x10 <sup>-2</sup> | -2.561 | 2  |
| 87 | hsa-miR-99b         | 1.51x10 <sup>-2</sup> | 4.31x10 <sup>-2</sup> | -2.594 | 19 |
| 88 | hsa-miR-489         | 1.53x10 <sup>-2</sup> | 4.31x10 <sup>-2</sup> | -2.602 | 7  |
| 89 | hsa-miR-182         | 1.60x10 <sup>-2</sup> | 4.36x10 <sup>-2</sup> | -2.508 | 7  |
| 90 | hsa-miR-409-3p      | 1.60x10 <sup>-2</sup> | 4.36x10 <sup>-2</sup> | -2.624 | 14 |
| 91 | hsa-miR-675         | 1.61x10 <sup>-2</sup> | 4.36x10 <sup>-2</sup> | 2.604  | 11 |
| 92 | hsa-miR-885-3p      | 1.63x10 <sup>-2</sup> | 4.36x10 <sup>-2</sup> | 2.641  | 3  |
| 93 | hsa-miR-324-3p      | 1.63x10 <sup>-2</sup> | 4.36x10 <sup>-2</sup> | -2.611 | 17 |
| 94 | hsa-miR-1274b       | 1.66x10 <sup>-2</sup> | 4.39x10 <sup>-2</sup> | 2.567  | 19 |
| 95 | hsa-miR-30c-2-star  | 1.88x10 <sup>-2</sup> | 4.91x10 <sup>-2</sup> | -2.564 | 6  |
| 96 | hsa-miR-92a         | 1.93x10 <sup>-2</sup> | 5.00x10 <sup>-2</sup> | -2.547 | X  |

Name of the miRNAs corresponds to miRBase v.15 nomenclature, used in Affymetrix array. “v-11” refers to miRBase version 11. P-value was obtained by t-test assessing the differences between BCVY patients (younger than 35 years old) and older than 65 years BC patients. FDR stands for the p-value adjusted by False Discovery Rate. # is the order number according to the signification value.
